# Supplementary material for: One dimensional CdS/ZnO nanocomposites: an efficient photocatalyst for hydrogen generation
Source: Royal Society of Chemistry journal article supplement (doi:10.1039/c4ra08561b), 2014-01-01
Supplement: c4ra08561b1.pdf [file c4ra08561b1.pdf]

Supporting information

## One Dimensional CdS/ZnO Nanocomposites: An Efficient Photocatalyst for Hydrogen Generation

Jamuna K. Vaishnav, Sudhir S. Arbuj\*, Sunit B. Rane and Dinesh P. Amalnerkar

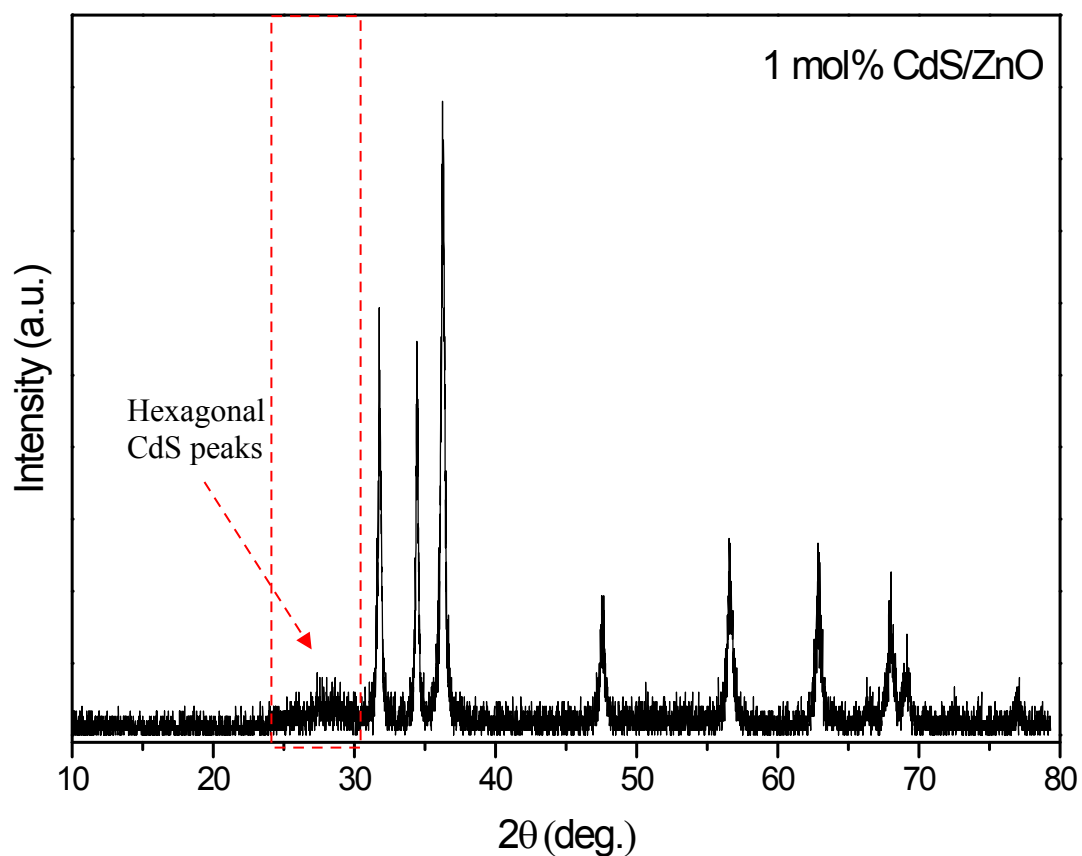

**Figure S1.** XRD of 1 mol% CdS/ZnO nanocomposite

Fig. S2

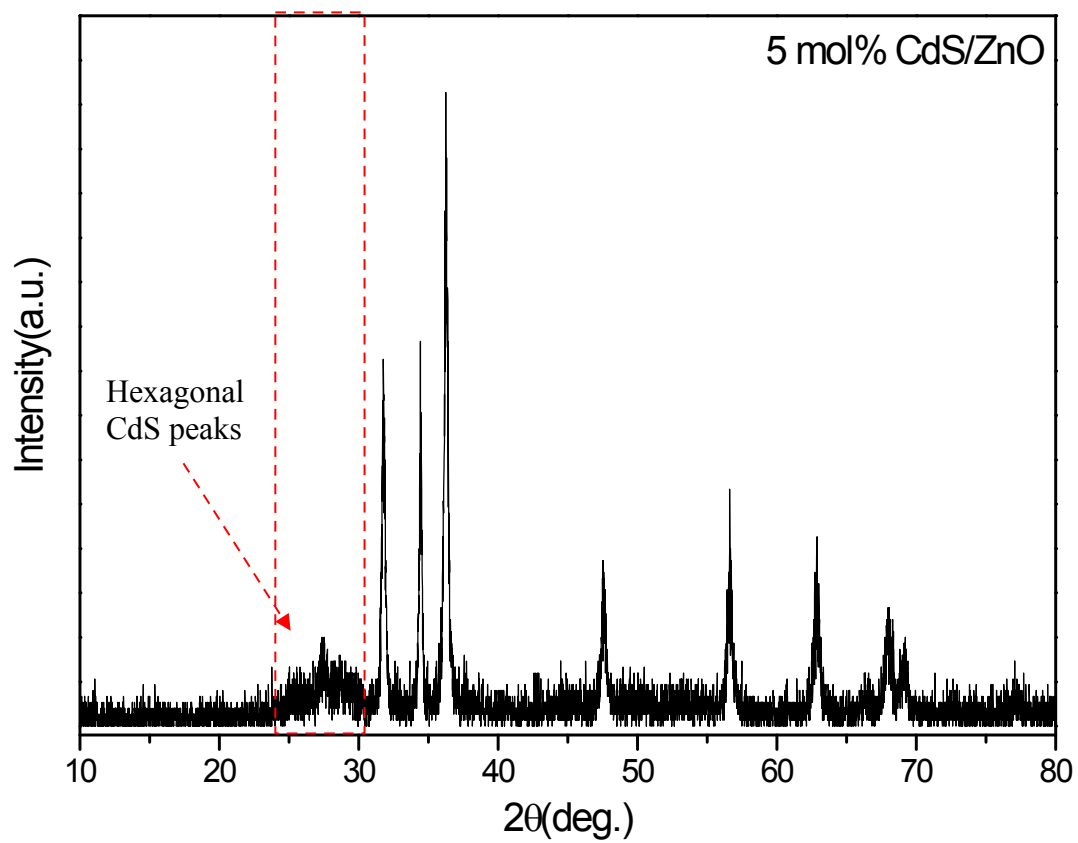

Figure S2. XRD of 5 mol% CdS/ZnO nanocomposite
